# Supplementary material
Source: PubMed Central journal article supplement (PMC1088664)

This is an electronic appendix to the paper by Ord *et al.* 2001 Intrasexual selection predicts the evolution of signal complexity in lizards. *Proc. R. Soc. Lond. B* **268**, 737–744.

Electronic appendices are refereed with the text. However, no attempt has been made to impose a uniform editorial style on the electronic appendices.

## APPENDIX A

(Ord *et al.*: Intra-sexual selection predicts the evolution of signal complexity in lizards)

Table A-1. *Sources consulted for species data*

| species                        | repertoire size <sup>a</sup> | SSD  | body size <sup>b</sup> (mm SVL) | references <sup>c</sup> |
|--------------------------------|------------------------------|------|---------------------------------|-------------------------|
| <i>Agama agama</i>             | 4                            | 1.31 | 128                             | 1                       |
| <i>Amblyrhynchus cristatus</i> | 5                            | 1.25 | 318                             | 2-4                     |
| <i>Amphibolurus muricatus</i>  | 2                            | 1.05 | 125                             | 5, 6, 7                 |
| <i>Anolis acutus</i>           | 2                            | 1.35 | 66                              | 8, 9                    |
| <i>A. aeneus</i>               | 5                            | 1.40 | 60                              | 9-17                    |
| <i>A. auratus</i>              | 3                            | 1.00 | 51                              | 18-21                   |
| <i>A. bonairensis</i>          | 6                            | 1.25 | 75                              | 9, 10                   |
| <i>A. brevirostris</i>         | 1                            | 1.09 | 51                              | 22                      |
| <i>A. carolinensis</i>         | 8                            | 1.19 | 64                              | 23-34                   |
| <i>A. carpenteri</i>           | 5                            | 0.93 | 41                              | 21, 35                  |
| <i>A. caudalis</i>             | 3                            | 1.09 | 51                              | 22                      |
| <i>A. cristatellus</i>         | 6                            | 1.43 | 70                              | 8, 36                   |
| <i>A. cupreus</i>              | 5                            | 1.17 | 55                              | 21, 35                  |
| <i>A. distichus</i>            | 2                            | 1.09 | 50                              | 37, 38                  |
| <i>A. extremus</i>             | 5                            | 1.38 | 83                              | 9, 10                   |
| <i>A. griseus</i>              | 5                            | 1.48 | 127                             | 9, 10                   |
| <i>A. humilis</i>              | 5                            | 0.95 | 38                              | 21, 35                  |
| <i>A. intermedius</i>          | 5                            | 1.00 | 54                              | 21, 35                  |
| <i>A. limifrons</i>            | 5                            | 0.95 | 40                              | 21, 35, 39, 40          |
| <i>A. lineatopus</i>           | 5                            | 1.49 | 70                              | 41                      |
| <i>A. luciae</i>               | 5                            | 1.55 | 85                              | 10, 42                  |
| <i>A. nebulosus</i>            | 5                            | 1.17 | 42                              | 43-46                   |
| <i>A. opalinus</i>             | 8                            | 1.20 | 48                              | 42, 47, 48              |
| <i>A. pentaprion</i>           | 5                            | 1.24 | 75                              | 35, 49                  |
| <i>A. richardii</i>            | 5                            | 1.62 | 125                             | 9, 10                   |
| <i>A. roquet</i>               | 6                            | 1.30 | 80                              | 9, 10, 42               |
| <i>A. sagrei</i>               | 6                            | 1.34 | 55                              | 27, 31, 33, 50, 51      |
| <i>A. sericeus</i>             | 5                            | 1.04 | 50                              | 21, 35                  |
| <i>A. trinitatis</i>           | 6                            | 1.30 | 72                              | 9, 10, 11, 42           |
| <i>A. tropidolepis</i>         | 5                            | 1.02 | 59                              | 21, 35                  |
| <i>A. valencienni</i>          | 0                            | 1.16 | 85                              | 52                      |
| <i>Callisaurus draconoides</i> | 5                            | 1.24 | 93                              | 53                      |

|                                    |   |      |     |             |
|------------------------------------|---|------|-----|-------------|
| <i>Chalarodon madagascariensis</i> | 5 | 1.30 | 87  | 54          |
| <i>Conolophus subcristatus</i>     | 6 | 1.26 | 400 | 3, 55, 56   |
| <i>Crotaphytus collaris</i>        | 4 | 1.05 | 110 | 57-59       |
| <i>Ctenophorus fionni</i>          | 5 | 1.08 | 96  | 7, 60, 61   |
| <i>C. fordi</i>                    | 1 | 0.96 | 53  | 6, 7, 62-64 |
| <i>C. maculosus</i>                | 4 | 1.17 | 69  | 7, 65       |
| <i>Ctenosaura similis</i>          | 1 | 1.25 | 302 | 3, 49, 66   |
| <i>Cyclura carinata</i>            | 5 | 1.19 | 267 | 3, 67, 68   |
| <i>C. cornuta</i>                  | 2 | 1.04 | 355 | 3, 68, 69   |
| <i>C. ricordi</i>                  | 0 | 1.04 | 355 | 68, 69      |
| <i>Dipsosaurus dorsalis</i>        | 3 | 1.00 | 144 | 3, 70-72    |

---

Table A-1. (continued)

| species                          | repertoire size <sup>a</sup> | SSD  | body size <sup>b</sup><br>(mm SVL) | references <sup>c</sup> |
|----------------------------------|------------------------------|------|------------------------------------|-------------------------|
| <i>Gambelia sila</i>             | 4                            | 1.09 | 97                                 | 56, 73, 74              |
| <i>G. wislizenii</i>             | 3                            | 0.93 | 102                                | 56,74, 75               |
| <i>Holbrookia propinqua</i>      | 5                            | 0.98 | 60                                 | 53, 76-78               |
| <i>Iguana iguana</i>             | 7                            | 1.32 | 360                                | 3, 79-82                |
| <i>Lophognathus temporalis</i>   | 1                            | 1.05 | 130                                | 7, 83, 84               |
| <i>Microlophus albemarlensis</i> | 4                            | 1.39 | 104                                | 85                      |
| <i>M. delanonis</i>              | 4                            | 1.37 | 129                                | 85                      |
| <i>M. grayii</i>                 | 4                            | 0.95 | 69                                 | 85                      |
| <i>Pogona barbata</i>            | 6                            | 1.06 | 250                                | 5, 7, 23, 86-88         |
| <i>Sauromalus obesus</i>         | 4                            | 1.06 | 164                                | 3, 89                   |
| <i>Sceloporus cyanogenys</i>     | 2                            | 1.08 | 130                                | 90, 91                  |
| <i>S. graciosus</i>              | 4                            | 1.00 | 57                                 | 92-94                   |
| <i>S. jarrovii</i>               | 4                            | 1.12 | 97                                 | 90, 95-97               |
| <i>S. magister</i>               | 2                            | 1.12 | 140                                | 96-98                   |
| <i>S. merriami</i>               | 4                            | 1.04 | 58                                 | 96, 97, 99, 100         |
| <i>S. occidentalis</i>           | 2                            | 0.96 | 70                                 | 96, 101-103             |
| <i>S. poinsetti</i>              | 2                            | 1.20 | 120                                | 90, 96, 97              |
| <i>S. undulatus</i>              | 3                            | 1.00 | 83                                 | 51, 92, 104-107         |
| <i>Urosaurus ornatus</i>         | 2                            | 1.00 | 53                                 | 100, 108-112            |
| <i>Uta stansburiana</i>          | 4                            | 1.10 | 54                                 | 42, 56, 113-117         |
| outgroup species                 |                              |      |                                    |                         |
| <i>Ameiva</i>                    | 0                            |      |                                    | 51, 118                 |
| <i>Carlia</i>                    | 0                            |      |                                    | 119                     |
| <i>Cnemidophorus</i>             | 0                            |      |                                    | 120-122                 |
| <i>Coleonyx</i>                  | 0                            |      |                                    | 123                     |
| <i>Diplodactylus</i>             | 0                            |      |                                    | 124                     |
| <i>Egernia</i>                   | 0                            |      |                                    | 64, 125                 |
| <i>Eumeces</i>                   | 0                            |      |                                    | 51, 126-132             |
| <i>Lacerta</i>                   | 0                            |      |                                    | 23                      |
| <i>Lampropholis</i>              | 0                            |      |                                    | 133, 134                |
| <i>Nephrurus</i>                 | 0                            |      |                                    | 123                     |
| <i>Pristurus</i>                 | 0                            |      |                                    | 135                     |
| <i>Sphenomorphus</i>             | 0                            |      |                                    | 136                     |
| <i>Varanus</i>                   | 0                            |      |                                    | 23, 63, 137-141         |

<sup>a</sup>Repertoire size: data on the number of display modifiers were obtained when at least one 'core' display component was also present. Species with no core displays were scored as having a repertoire size of 0 regardless of the number of modifiers reported. Core displays include head-nods and/or push-ups.

<sup>b</sup>Body size: as males are typically the sex conducting visual displays in lizards, male body size was used.

<sup>c</sup>1, Harris 1964; 2, Carpenter 1966b; 3, Carpenter 1982; 4, Schmidt 1935; 5, Carpenter *et al.* 1970; 6, Harlow & Taylor, in press; 7, Greer 1989; 8, Philibosian 1975; 9,

Roughgarden 1995; 10, Gorman 1968; 11, Gorman 1969; 12, Stamps 1973; 13, Stamps & Barlow 1973; 14, Stamps 1976; 15, Stamps & Crews 1976; 16, Stamps 1978; 17, Stamps & Krishnan 1994; 18, Fleishman 1988*b*; 19, Fleishman 1988*a*; 20, Fleishman 1992; 21, Andrews 1979; 22, Jenssen & Gladson 1984; 23, Bels 1992; 24, Cooper 1977; 25, Crews 1975; 26, Evans 1935; 27, Evans 1938*a*; 28, Greenberg & Noble 1944; 29, Greenberg 1977; 30, Jenssen *et al.* 1995; 31, Macedonia & Stamps 1994; 32, McMann 1993; 33, Tokarz & Beck 1987; 34, Ruby 1984; 35, Echelle *et al.* 1971; 36, Ortiz & Jenssen 1982; 37, Jenssen 1983; 38, Stamps *et al.* 1997; 39, Hover & Jenssen 1976; 40, Jenssen & Hover 1976; 41, Rand 1967; 42, Rogner 1997; 43, Jenssen 1970*a*; 44, Jenssen 1970*b*; 45, Jenssen 1971; 46, Lister & Aguayo 1992; 47, Jenssen 1979*a*; 48, Jenssen 1979*b*; 49, Fitch 1976; 50, Evans 1938*b*; 51, Noble & Teale 1930; 52, Hicks & Trivers 1983; 53, Clarke 1965; 54, Blanc & Carpenter 1969; 55, Carpenter 1969; 56, Stamps 1983; 57, Fitch 1956; 58, Greenberg 1945; 59, Yedlin & Ferguson 1973; 60, Gibbons 1979; 61, Johnston 1997; 62, Cogger 1978; 63, Tsellarius & Tsellarius 1997; 64, Webber 1981; 65, Mitchell 1973; 66, Henderson 1973; 67, Iverson 1979; 68, Martins & Lamont 1998; 69, Carey 1975; 70, Carpenter 1961*a*; 71, Norris 1953; 72, Parker 1972; 73, Montanucci 1965; 74, Tollestrup 1983; 75, Montanucci 1967; 76, Cooper 1985; 77, Cooper 1988; 78, Cooper & Guillette 1991; 79, Distel & Veazey 1982; 80, Dugan 1982*a*; 81, Lazell 1973; 82, Dugan 1982*b*; 83, Blamires 1998; 84, Harlow, unpublished data; 85, Carpenter 1966*a*; 86, Brattstrom 1971; 87, Lee & Badham 1963; 88, Badham 1976; 89, Nagy 1973; 90, Hunsaker 1962; 91, Greenberg 1973; 92, Ferguson 1971; 93, Martins 1991; 94, Martins 1993*b*; 95, Ruby 1977; 96, Martins 1994; 97, Martins 1993*a*; 98, Vitt *et al.* 1974; 99, Carpenter 1961*b*; 100, Milstead 1970; 101, Fitch 1940; 102, Tarr 1982; 103, Purdue & Carpenter 1972*a*; 104, Cooper & Burns 1987; 105, Ferguson 1973; 106, Roggenbuck & Jenssen 1986; 107, Rothblum & Jenssen 1978; 108, Carpenter & Grubitz 1960; 109, Carpenter & Grubitz 1961; 110, Mahrt 1998; 111, Thompson & Moore 1992; 112, Zucker 1987; 113, Carpenter 1962; 114, Ferguson 1966; 115, Ferguson 1970*a*; 116, Ferguson 1970*b*; 117, Purdue & Carpenter 1972*b*; 118, Lewis & Saliva 1987; 119, Whittier & Martin 1992; 120, Brackin 1978; 121, Carpenter 1960; 122, Schall 1974; 123, Greenberg 1943; 124, Bustard 1964; 125, Hickman 1960; 126, Breckenridge 1943; 127, Cooper & Vitt 1987*b*; 128, Cooper & Vitt 1987*a*; 129, Everett 1971; 130, Fitch 1955; 131, Mount 1963; 132, Perrill 1980; 133, Torr & Shine 1994; 134, Torr & Shine 1996; 135, Ross 1990; 136, Done & Heatwole 1977; 137, Auffenberg 1983; 138, Bels *et al.* 1995; 139, Carpenter *et al.* 1976; 140, Murphy & Mitchell 1974; 141, Twigg 1988).

## REFERENCES

- Andrews, R. M. 1979 Evolution of life histories: a comparison of *Anolis* lizards from matched island and mainland habitats. *Breviora* **454**, 1-51.
- Auffenberg, W. 1983 Courtship behaviour in *Varanus bengalensis* Sauria: Varanidae. In *Advances in herpetology and evolutionary biology* (ed. A. G. J. Rhodin & K. Miyata), pp. 535-551. Cambridge: Museum of Comparative Zoology.
- Badham, J. A. 1976 The *Amphibolurus barbatus* species-group Lacertilia: Agamidae. *Aust. J. Zool.* **24**, 423-443.
- Bels, V. L. 1992 Functional analysis of the ritualized behavioural motor pattern in lizards: evolution of behaviour and the concept of ritualization. *Zool. JB. (Anat.)* **122**, 141-159.
- Bels, V. L., Gasc, J. P., Goosse, V., Renous, S. & Vernet, R. 1995 Functional analysis of the throat display in the sand goanna *Varanus griseus* Reptilia: Squamata: Varanidae. *J. Zool. Lond.* **235**, 95-116.
- Blamires, S. J. 1998 Circumduction and head bobbing in the agamid lizard *Lophognathus temporalis*. *Herpetofauna* **28**, 51-52.
- Blanc, C. P. & Carpenter, C. C. 1969 Studies on the Iguanidae of Madagascar. III. Social and reproductive behaviour of *Chalarodon madagascariensis*. *J. Herpetol.* **3**, 125-134.
- Brackin, M. F. 1978 The relation of rank to physiological state in *Cnemidophorus sexlineatus* dominance hierarchies. *Herpetologica* **34**, 185-191.
- Brattstrom, B. H. 1971 Social and thermoregulatory behaviour of the bearded dragon, *Amphibolurus barbatus*. *Copeia* **1971**, 484-497.
- Breckenridge, W. J. 1943 The life history of the black-banded skink *Eumeces septentrionalis septentrionalis* Baird. *Am. Mid. Nat.* **29**, 591-666.
- Bustard, H. R. 1964 Defensive behaviour shown by Australian geckos, genus *Diplodactylus*. *Herpetologica* **20**, 198-200.
- Carey, W. M. 1975 The rock iguana, *Cyclura pinguis*, on Anegada, British Virgin Islands, with notes on *Cyclura ricordi* and *Cyclura cornuta* on Hispaniola. *Bull. Florida St. Mus. Biol. Sci.* **19**, 189-234.
- Carpenter, C. C. 1960 Reproduction in Oklahoma *Sceloporus* and *Cnemidophorus*. *Herpetologica* **16**, 175-182.
- Carpenter, C. C. 1961a Patterns of social behaviour in the desert iguana, *Dipsosaurus dorsalis*. *Copeia* **1961**, 396-405.
- Carpenter, C. C. 1961b Patterns of social behaviour of Merriam's canyon lizard *Sceloporus m. merriami* - Iguanidae. *Southwest. Nat.* **6**, 138-148.
- Carpenter, C. C. 1962 A comparison of the patterns of display of *Urosaurus*, *Uta*, and *Streptosaurus*. *Herpetologica* **18**, 145-152.
- Carpenter, C. C. 1966a Comparative behaviour of the Galapagos lava lizards *Tropidurus*. In *The Galapagos: Proceedings of the Galapagos international scientific project* (ed. R. Bowman), pp. 269-273. Berkeley: University of California Press.
- Carpenter, C. C. 1966b The marine iguana of the Galapagos Islands, its behaviour and ecology. *Proc. California Acad. Sci.* **34**, 329-376.
- Carpenter, C. C. 1969 Behavioural and ecological notes on the Galapagos land iguanas. *Herpetologica* **25**, 155-164.
- Carpenter, C. C. 1982 The aggressive displays of iguanine lizards. In *Iguanas of the world: their behaviour, ecology and conservation* (ed. G. M. Burghardt & A. S. Rand), pp. 215-231. New Jersey: Noyes Publications.
- Carpenter, C. C. & Grubitz, G. G. 1960 Dominance shifts in the tree lizard *Urosaurus ornatus* - Iguanidae. *Southwest. Nat.* **5**, 123-128.

- Carpenter, C. C. & Grubitz, G. G. 1961 Time-motion study of a lizard. *Ecology* **42**, 199-200.
- Carpenter, C. C., Badham, J. A. & Kimble, B. 1970 Behaviour patterns of three species of *Amphibolurus* Agamidae. *Copeia* **1970**, 497-505.
- Carpenter, C. C., Gillingham, J. C. & Murphy, M. A. 1976 Further analysis of the combat ritual of the pygmy mulga monitor, *Varanus gilleni* Reptilia: Varanidae. *Herpetologica* **32**, 35-40.
- Clarke, R. F. 1965 An ethological study of the iguanid lizard genera *Callisaurus*, *Cophosaurus*, and *Holbrookia*. *Emporia St. Res. Studies* **13**, 1-66.
- Cogger, H. G. 1978 Reproductive cycles, fat body cycles and socio-sexual behaviour in the mallee dragon, *Amphibolurus fordi* Lacertilia: Agamidae. *Aust. J. Zool.* **26**, 653-672.
- Cooper, W. E. 1977 Information analysis of agonistic behavioural sequences in male iguanid lizards, *Anolis carolinensis*. *Copeia* **1977**, 721-735.
- Cooper, W. E. 1985 Female residency and courtship intensity in a territorial lizard, *Holbrookia propinqua*. *Amph.-Rept.* **6**, 63-69.
- Cooper, W. E. 1988 Aggressive behaviour and courtship rejection in brightly and plainly coloured female keeled earless lizards *Holbrookia propinqua*. *Ethology* **77**, 265-278.
- Cooper, W. E. & Burns, N. 1987 Social significance of ventrolateral colouration in the fence lizard, *Sceloporus undulatus*. *Anim. Behav.* **35**, 526-532.
- Cooper, W. E. & Guillette, L. J. 1991 Observations on activity, display behaviour, coloration and androgen levels in the keeled earless lizard, *Holbrookia propinqua*. *Amph.-Rept.* **12**, 57-66.
- Cooper, W. E. & Vitt, L. J. 1987a Deferred agonistic behaviour in a long-lived scincid lizards *Eumeces laticeps*. *Oecologia* **72**, 321-326.
- Cooper, W. E. & Vitt, L. J. 1987b Ethological isolation, sexual behaviour and pheromones in the Fasciatus species group of the lizard genus *Eumeces*. *Ethology* **75**, 328-336.
- Crews, D. 1975 Inter- and intra-individual variation in display patterns in the lizard, *Anolis carolinensis*. *Herpetologica* **31**, 37-47.
- Distel, H. & Veazey, J. 1982 The behavioural inventory of the green iguana, *Iguana iguana*. In *Iguanas of the world* (ed. G. M. Burghardt & A. S. Rand), pp. 252-270. New Jersey: Noyes Publications.
- Done, B. S. & Heatwole, H. 1977 Social behaviour of some Australian skinks. *Copeia* **1977**, 419-430.
- Dugan, B. 1982a A field study of the headbob displays of male green iguanas *Iguana iguana*: variation in form and context. *Anim. Behav.* **30**, 327-338.
- Dugan, B. 1982b The mating behaviour of the green iguana, *Iguana iguana*. In *Iguanas of the world* (ed. G. M. Burghardt & A. S. Rand), pp. 320-365. New Jersey: Noyes Publications.
- Echelle, A. A., Echelle, A. F. & Fitch, H. S. 1971 A comparative analysis of aggressive display in nine species of Costa Rican *Anolis*. *Herpetologica* **27**, 271-288.
- Evans, L. T. 1935 Winter mating and fighting behaviour of *Anolis carolinensis* as induced by pituitary injections. *Copeia* **1935**, 3-6.
- Evans, L. T. 1938a Courtship behaviour and sexual selection of *Anolis*. *J. Comp. Psychol.* **26**, 475-492.
- Evans, L. T. 1938b Cuban field studies on territoriality of the lizard, *Anolis sagrei*. *J. Comp. Psychol.* **35**, 97-123.
- Everett, C. T. 1971 Courtship and mating of *Eumeces multivirgatus* Scincidae. *J. Herpetol.* **5**, 189-190.

- Ferguson, G. W. 1966 Releasers of courtship and territorial behaviour in the side blotched lizard *Uta stansburiana*. *Anim. Behav.* **14**, 89-92.
- Ferguson, G. W. 1970a Mating behaviour of the side-blotched lizards of the genus *Uta* Sauria: Iguanidae. *Anim. Behav.* **18**, 65-72.
- Ferguson, G. W. 1970b Variation and evolution of the push-up displays of the side-blotched lizard genus *Uta* Iguanidae. *Syst. Zool.* **19**, 79-101.
- Ferguson, G. W. 1971 Observations on the behaviour and interactions of two sympatric *Sceloporus* in Utah. *Am. Mid. Nat.* **86**, 190-196.
- Ferguson, G. W. 1973 Character displacement of the push-up displays of two partially-sympatric species of spiny lizards, *Sceloporus* Sauria: Iguanidae. *Herpetologica* **29**, 281-284.
- Fitch, H. S. 1940 A field study of the growth and behaviour of the fence lizard. *Uni. California Pub. Zool.* **44**, 151-172.
- Fitch, H. S. 1955 Habits and adaptations of the great plains skink *Eumeces obsoletus*. *Ecol. Mono.* **25**, 59-83.
- Fitch, H. S. 1956 An ecological study of the collared lizard *Crotaphytus collaris*. *Uni. Kansas Pub. Mus. Nat. Hist.* **8**, 213-274.
- Fitch, H. S. 1976 Sexual size differences in the mainland anoles. *Occ. Papers Mus. Nat. Hist. Univ. Kansas* **50**, 1-21.
- Fleishman, L. J. 1988a Sensory influences on physical design of a visual display. *Anim. Behav.* **36**, 1420-1424.
- Fleishman, L. J. 1988b The social behaviour of *Anolis auratus*, a grass Anole from Panama. *Herpetologica* **22**, 13-23.
- Fleishman, L. J. 1992 The influence of the sensory system and the environment on motion patterns in the visual displays of anoline lizards and other vertebrates. *Am. Nat.* **139**, S36-S61.
- Gibbons, J. R. 1979 The hind leg pushup display of the *Amphibolurus decresii* species complex Lacertilia: Agamidae. *Copeia* **1979**, 29-40.
- Gorman, G. C. 1968 The relationships of *Anolis* of the Roquet species group Sauria: Iguanidae – III. Comparative study of display behaviour. *Breviora* **284**, 1-31.
- Gorman, G. C. 1969 Intermediate territorial display of a hybrid *Anolis* lizard Sauria: Iguanidae. *Zeit. Tierpsychol.* **26**, 390-393.
- Greenberg, B. 1943 Social behaviour of the western banded gecko, *Coleonyx variegatus* Baird. *Physiol. Zool.* **16**, 110-122.
- Greenberg, B. 1945 Notes on the social behaviour of the collared lizard. *Copeia* **1945**, 225-230.
- Greenberg, B. & Noble, G. K. 1944 Social behavior of the American chameleon *Anolis carolinensis* Voigt. *Physiol. Zool.* **17**, 392-439.
- Greenberg, N. B. 1973 *Behavioural studies of the blue spiny lizard*. Thesis, New Jersey: Rutgers University.
- Greenberg, N. B. 1977 A neuroethological study of display behaviour in the lizard *Anolis carolinensis* Reptilia, Lacertilia, Iguanidae. *Am. Zool.* **17**, 191-201.
- Greer, A. E. 1989 *The biology and evolution of Australian lizards*. Chipping Norton: Surrey Beatty & Sons.
- Harlow, P. & Taylor, J. in press. Reproductive ecology of the jacky dragon (*Amphibolurus muricatus*): an agamid lizard with temperature-dependent sex determination. *Austral. Ecology*.
- Harris, V. A. 1964 *The life of the rainbow lizard*. London: Hutchinson & Co.
- Henderson, R. W. 1973 Ethoecological observations of *Ctenosaura similis* Sauria: Iguanidae in British Honduras. *J. Herpetol.* **7**, 27-33.
- Hickman, J. L. 1960 Observations on the skink lizard *Egernia whitii* Lacepede. *Proc. R. Soc. Tas.* **94**, 111-119.

- Hicks, R. A. & Trivers, R. L. 1983 The social behaviour of *Anolis valencienni*. In *Advances in herpetology and evolutionary biology* (ed. A. G. J. Rhodin & K. Miyata), pp. 570-595. Cambridge: Museum of Comparative Zoology.
- Hover, E. L. & Jenssen, T. A. 1976 Descriptive analysis and social correlates of agonistic displays of *Anolis limifrons* Sauria, Iguanidae. *Behaviour* **58**, 173-191.
- Hunsaker, D. 1962 Ethological isolating mechanisms in the *Sceloporus torquatus* group of lizards. *Evolution* **16**, 62-74.
- Iverson, J. B. 1979 Behaviour and ecology of the rock iguana *Cyclura carinata*. *Bull. Florida St. Mus. Biol. Sci.* **24**, 1-358.
- Jenssen, T. A. 1970a Female response to filmed displays of *Anolis nebulosus* Sauria, Iguanidae. *Anim. Behav.* **18**, 640-647.
- Jenssen, T. A. 1970b The ethoecology of *Anolis nebulosus* Sauria, Iguanidae. *J. Herpetol.* **4**, 1-38.
- Jenssen, T. A. 1971 Display analysis of *Anolis nebulosus* Sauria, Iguanidae. *Copeia* **1971**, 197-209.
- Jenssen, T. A. 1979a Display behaviour of male *Anolis opalinus* Sauria, Iguanidae: a case of weak display stereotypy. *Anim. Behav.* **27**, 173-184.
- Jenssen, T. A. 1979b Display modifiers of *Anolis opalinus* Lacertilia: Iguanidae. *Herpetologica* **35**, 21-30.
- Jenssen, T. A. 1983 Display behaviour of two Haitian lizards, *Anolis cybotes* and *Anolis distichus*. In *Advances in herpetology and evolutionary biology* (ed. A. G. J. Rhodin & K. Miyata), pp. 552-569. Cambridge: Museum of Comparative Zoology.
- Jenssen, T. A. & Gladson, N. L. 1984 A comparative display analysis of the *Anolis brevirostris* complex in Haiti. *J. Herpetol.* **18**, 217-230.
- Jenssen, T. A. & Hover, E. L. 1976 Display analysis of the signature display of *Anolis limifrons* Sauria: Iguanidae. *Behaviour* **57**, 227-240.
- Jenssen, T. A., Greenberg, N. & Hovde, K. A. 1995 Behavioural profile of free-ranging male lizards, *Anolis carolinensis*, across breeding and post-breeding seasons. *Herpetol. Mono.* **9**, 41-662.
- Johnston, G. 1997 *Behavioural ecology of the peninsula dragon lizard Ctenophorus fionni*. Thesis, Adelaide: Flinders University.
- Lazell, J. D. 1973 The lizard genus *Iguana* in the lesser Antilles. *Bull. Mus. Comp. Zool.* **145**, 1-28.
- Lee, A. K. & Badham, J. A. 1963 Body temperature, activity, and behaviour of the agamid lizard, *Amphibolurus barbatus*. *Copeia* **1963**, 387-394.
- Lewis, A. R. & Saliva, J. E. 1987 Effects of sex and size on home range, dominance, and activity budgets in *Ameiva exsul* Lacertilia: Teiidae. *Herpetologica* **43**, 374-383.
- Lister, B. C. & Aguayo, A. G. 1992 Seasonality, predation, and the behaviour of a tropical mainland anole. *J. Anim. Ecol.* **61**, 717-733.
- Macedonia, J. M. & Stamps, J. A. 1994 Species recognition in *Anolis grahami* Sauria, Iguanidae: evidence from responses to video playbacks of conspecific and heterospecific displays. *Ethology* **98**, 246-264.
- Mahrt, L. A. 1998 Territorial establishment and maintenance by female tree lizards, *Urosaurus ornatus*. *J. Herpetol.* **32**, 176-182.
- Martins, E. P. 1991 Individual and sex differences in the use of the push-up display by the sagebrush lizard, *Sceloporus graciosus*. *Anim. Behav.* **41**, 403-416.
- Martins, E. P. 1993a A comparative study of the evolution of *Sceloporus* push-up displays. *Am. Nat.* **142**, 994-1018.



- Martins, E. P. 1993b Contextual use of the push-up display by the sagebrush lizard, *Sceloporus graciosus*. *Anim. Behav.* **45**, 25-36.
- Martins, E. P. 1994 Phylogenetic perspectives on the evolution of lizard territoriality. In *Lizard ecology: historical and experimental perspectives* (ed. L. J. Vitt & E. R. Pianka), pp. 117-144. Princeton: Princeton University Press.
- Martins, E. P. & Lamont, J. 1998 Estimating ancestral states of a communicative display: a comparative study of *Cyclura* rock iguanas. *Anim. Behav.* **55**, 1685-1706.
- McMann, S. 1993 Contextual signalling and the structure of dyadic encounters in *Anolis carolinensis*. *Anim. Behav.* **46**, 657-668.
- Milstead, W. W. 1970 Late summer behaviour of the lizards *Sceloporus merriami* and *Urosaurus ornatus* in the field. *Herpetologica* **26**, 343-354.
- Mitchell, F. J. 1973 Studies on the ecology of the agamid lizard *Amphibolurus maculosus* Mitchell. *Trans. R. Soc. South Aust.* **97**, 47-76.
- Montanucci, R. R. 1965 Observations on the San Joaquin leopard lizard, *Crotaphytus wislizenii silus* Stejneger. *Herpetologica* **21**, 270-283.
- Montanucci, R. R. 1967 Further studies on leopard lizards, *Crotaphytus wislizenii*. *Herpetologica* **23**, 119-126.
- Mount, R. H. 1963 The natural history of the red-tailed skink, *Eumeces egregius* Baird. *Am. Mid. Nat.* **70**, 356-385.
- Murphy, J. B. & Mitchell, L. A. 1974 Ritualised combat behaviour of the pygmy mulga monitor lizard, *Varanus gilleni* Sauria: Varanidae. *Herpetologica* **30**, 90-97.
- Nagy, K. A. 1973 Behaviour, diet and reproduction in a desert lizard, *Sauromalus obesus*. *Copeia* **1973**, 93-102.
- Noble, G. K. & Teale, H. K. 1930 The courtship of some iguanid and teiid lizards. *Copeia* **1930**, 54-56.
- Norris, K. S. 1953 The ecology of the desert iguana *Dipsosaurus dorsalis*. *Ecology* **34**, 265-287.
- Ortiz, P. R. & Jenssen, T. A. 1982 Interspecific aggression between lizard competitors, *Anolis cooki* and *Anolis cristatellus*. *Zeit. Tierpsychol.* **60**, 227-238.
- Parker, W. S. 1972 Notes on *Dipsosaurus dorsalis* in Arizona. *Herpetologica* **28**, 226-229.
- Perrill, S. A. 1980 Social communication in *Eumeces inexpectatus*. *J. Herpetol.* **14**, 129-135.
- Philibosian, R. 1975 Territorial behaviour and population regulation in the lizards, *Anolis acutus* and *A. cristatellus*. *Copeia* **1975**, 428-443.
- Purdue, J. R. & Carpenter, C. C. 1972a A comparative study of the body movements of displaying males of the lizard genus *Sceloporus* Iguanidae. *Behaviour* **41**, 68-81.
- Purdue, J. R. & Carpenter, C. C. 1972b A comparative study of the display motion in the iguanid genera *Sceloporus*, *Uta*, and *Urosaurus*. *Herpetologica* **28**, 137-141.
- Rand, A. S. 1967 Ecology and social organisation in the iguanid lizard *Anolis lineatopus*. *Proc. US Nat. Mus.* **122**, 1-77.
- Roggenbuck, M. E. & Jenssen, T. A. 1986 The ontogeny of display behaviour in *Sceloporus undulatus* Sauria: Iguanidae. *Ethology* **71**, 153-165.
- Rogner, M. 1997 *Lizards*. Malabar: Krieger Publishing Company.
- Ross, W. 1990 Notes on the behaviour of *Pristurus rupestris* Reptilia: Gekkonidae with special reference to tail signalling. *F. Saud. Arab.* **11**, 300-305.

- Rothblum, L. & Jenssen, T. A. 1978 Display repertoire analysis of *Sceloporus undulatus hyacinthinus* Sauria: Iguanidae from South-Western Virginia. *Anim. Behav.* **26**, 130-137.
- Roughgarden, J. 1995 *Anolis lizards of the Caribbean: ecology, evolution and plate tectonics*. New York: Oxford University Press.
- Ruby, D. 1977 The function of shudder displays in the lizard *Sceloporus jarrovi*. *Copeia* **1977**, 110-114.
- Ruby, D. E. 1984 Male breeding success and differential access to females in *Anolis carolinensis*. *Herpetologica* **40**, 272-280.
- Schall, J. J. 1974 Population structure of the Aruban Whiptail lizard, *Cnemidophorus arubensis*, in varied habitats. *Herpetologica* **30**, 38-44.
- Schmidt, K. P. 1935 Notes on the breeding behaviour of lizards. *Field Mus. Natur. Hist., Zool. Ser.* **20**, 71-76.
- Stamps, J. A. 1973 Displays and social organisation in female *Anolis aeneus*. *Copeia* **1973**, 264-272.
- Stamps, J. A. 1976 Rainfall, activity and social behaviour in the lizard, *Anolis aeneus*. *Anim. Behav.* **24**, 603-608.
- Stamps, J. A. 1978 A field study of the ontogeny of social behaviour in the lizard *Anolis aeneus*. *Behaviour* **66**, 1-31.
- Stamps, J. A. 1983 Sexual selection, sexual dimorphism, and territoriality. In *Lizard ecology: studies of a model organism* (ed. R. B. Huey, E. R. Pianka & T. W. Schoener), pp. 169-204. Cambridge: Harvard University Press.
- Stamps, J. A. & Barlow, G. W. 1973 Variation and stereotypy in the displays of *Anolis aeneus* Sauria: Iguanidae. *Behaviour* **47**, 67-94.
- Stamps, J. A. & Crews, D. P. 1976 Seasonal changes in reproduction and social behaviour in the lizard *Anolis aeneus*. *Copeia* **3**, 467-476.
- Stamps, J. A. & Krishnan, V. V. 1994 Territory acquisition in lizards: I. First encounters. *Anim. Behav.* **47**, 1375-1385.
- Stamps, J. A., Losos, J. B. & Andrews, R. M. 1997 A comparative study of population density and sexual size dimorphism in lizards. *Am. Nat.* **149**, 64-90.
- Tarr, R. S. 1982 Species typical display behaviour following stimulation of the reptilian striatum. *Physiol. Behav.* **29**, 615-620.
- Thompson, C. W. & Moore, M. C. 1992 Behavioural and hormonal correlates of alternative reproductive strategies in a polygynous lizard: tests of the relative plasticity and challenge hypotheses. *Horm. Behav.* **26**, 568-585.
- Tokarz, R. R. & Beck, J. W. 1987 Behaviour of the suspected lizard competitors *Anolis sagrei* and *Anolis carolinensis*: an experimental test for behaviour interference. *Anim. Behav.* **35**, 722-734.
- Tollestrup, K. 1983 The social behaviour of two species of closely related leopard lizards, *Gambelia silus* and *Gambelia wislizenii*. *Zeit. Tierpsychol.* **62**, 307-320.
- Torr, G. A. & Shine, R. 1994 An ethogram for the small scincid lizard *Lampropholis guichenoti*. *Amph.-Rept.* **15**, 21-34.
- Torr, G. A. & Shine, R. 1996 Patterns of dominance in the small scincid lizard *Lampropholis guichenoti*. *J. Herpetol.* **30**, 230-237.
- Tsellarius, A. Y. & Tsellarius, E. Y. 1997 Behaviour of *Varanus griseus* during encounters with conspecifics. *Asiatic Herpetol. Res.* **7**, 108-130.
- Twigg, L. E. 1988 A note on agonistic behaviour in lace monitors *Varanus varius*. *Herpetofauna* **18**, 23-25.
- Vitt, L. J., Congdon, J. D., Hulse, A. C. & Platz, J. E. 1974 Territorial aggressive encounters and tail breaks in the lizard *Sceloporus magister*. *Copeia* **1974**, 990-993.

- Webber, P. 1981 To spy on a desert skink. *Aust. Nat. Hist.* **19**, 270-275.
- Whittier, J. M. & Martin, J. 1992 Aspects of social behaviour and dominance in male rainbow skinks, *Carlia rostralis*. *Aust. J. Zool.* **40**, 73-79.
- Yedlin, I. N. & Ferguson, G. W. 1973 Variations in aggressiveness of free-living male and female collared lizards, *Crotaphytus collaris*. *Herpetologica* **29**, 268-275.
- Zucker, N. 1987 Behaviour and movement patterns of the tree lizard *Urosaurus ornatus* Sauria: Iguanidae in semi-natural enclosures. *Southwest. Nat.* **32**, 321-333.

Figure A-1. Phylogenetic resolution of iguanian lizards illustrating ‘polytomies’ where the precise relationship between some species is left unresolved.

Figure A-2. The evolution of large display repertoires of iguanian lizards with Gekkonidae, Scincidae, Lacertidae, Teiidae and Varanidae outgroups revealing large repertoire size was absent at the ancestral node. Data were obtained from a variety of sources (table A-1). ■ = trait present, □ = trait absent, ◐ = equivocal reconstruction.

Figure A-1  
Ord *et al.*

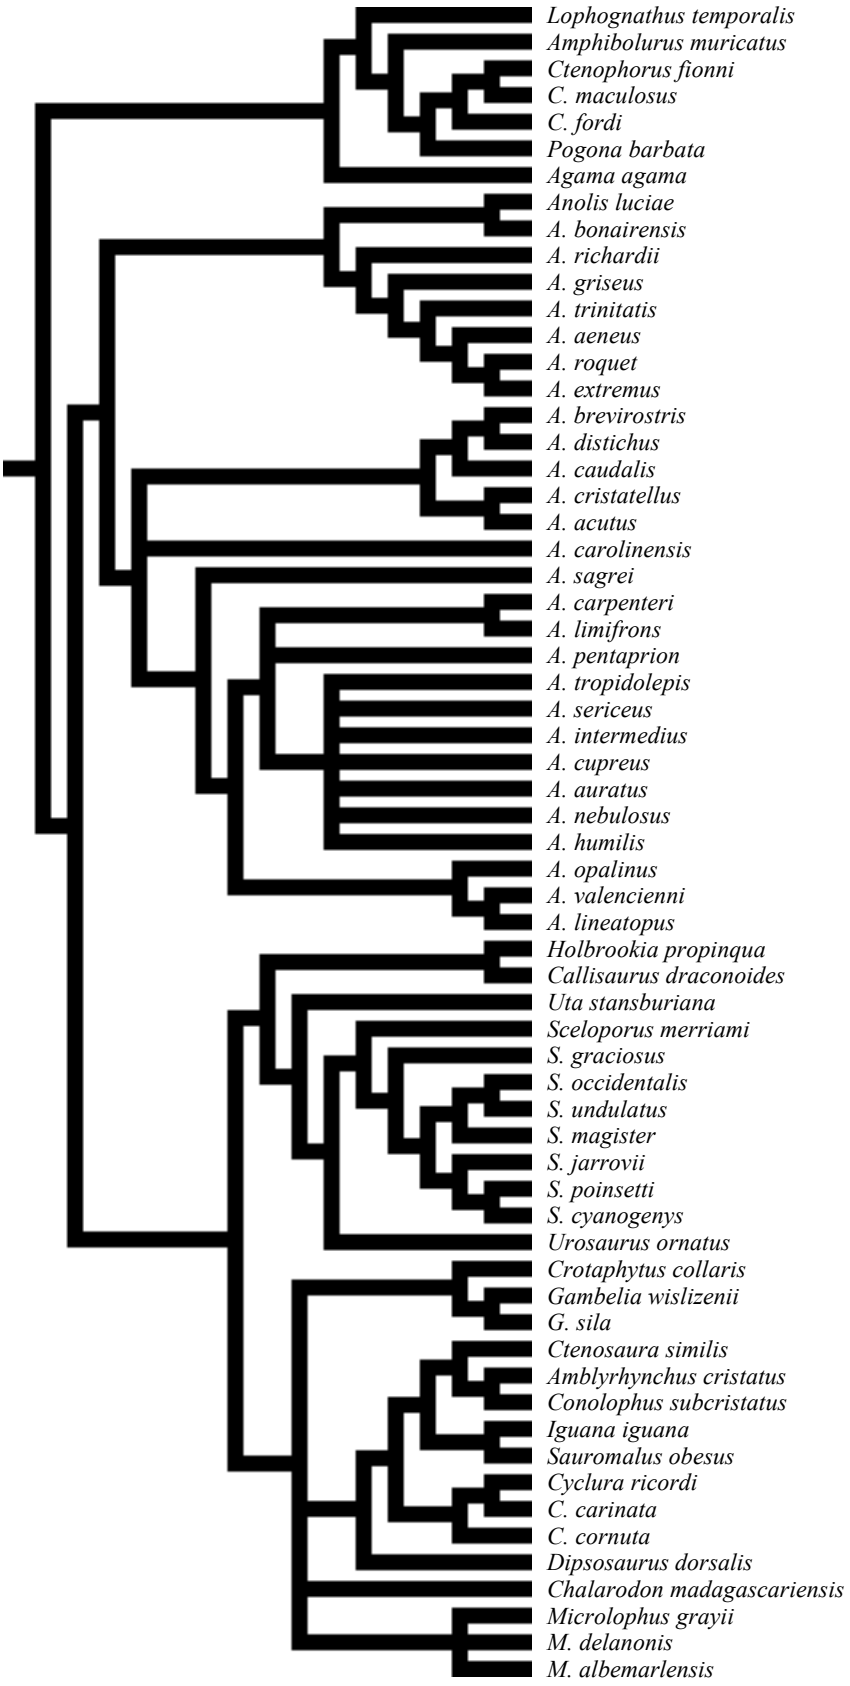

Figure A-2  
Ord *et al.*

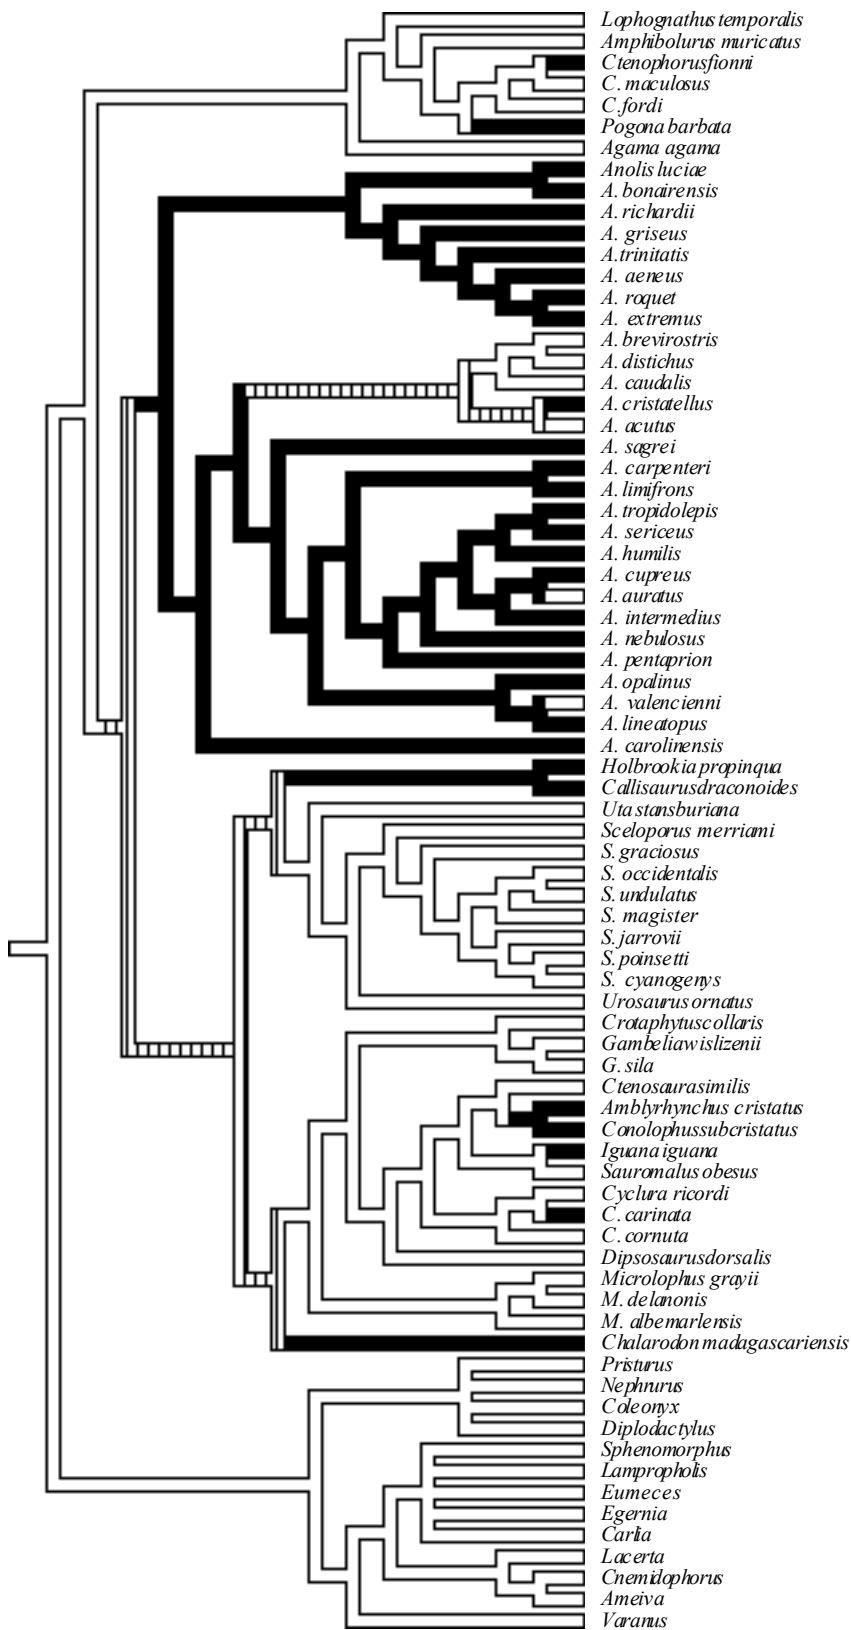

Supplement: PB010737s01.pdf [file PB010737s01.pdf]
